# Supplementary material
Source: publisher figshare collection journal article supplement (https://gsapubs.figshare.com/ndownloader/files/23306498)
Supplement: Supplementary file 1 [file 23306498]

**Pulsed magmatic fluid release for the formation of porphyry deposits: tracing fluid evolution in absolute-time from the Tibetan Qulong Cu-Mo deposit**

**Yang Li<sup>1,2\*</sup>, Xian-Hua Li<sup>2</sup>, David Selby<sup>1</sup> and Jian-Wei Li<sup>3</sup>**

<sup>1</sup> Department of Earth Sciences, Durham University, DH1 3LE, Durham, UK

<sup>2</sup> State Key Laboratory of Lithospheric Evolution, Institute of Geology and Geophysics, Chinese Academy of Sciences, 10029, Beijing, China

<sup>3</sup> State Key Laboratory of Geological Processes and Mineral Resources, China University of Geosciences, 430074, Wuhan, China

Corresponding author now at Department of Geology and Geophysics, Yale University, New Haven, 06511, USA. Email Address: yang.li@yale.edu; cugliyang@126.com.

***Table of Contents***

|                                                                          |           |
|--------------------------------------------------------------------------|-----------|
| <b>A1. List of supplementary tables and figures.....</b>                 | <b>2</b>  |
| <b>A2. Geological framework of Qulong .....</b>                          | <b>4</b>  |
| <b>A3. Samples and analytical methods .....</b>                          | <b>5</b>  |
| <b>A4. Oxygen isotope equilibrium time between water and quartz.....</b> | <b>9</b>  |
| <b>A5. References .....</b>                                              | <b>10</b> |

19 **A1. List of supplementary tables and figures**

20 Table DR1. Oxygen isotopic composition of quartz grains co-precipitated with molybdenite,  
21 with calculated estimates of the  $\delta^{18}\text{O}_{\text{fluid}}$  and magmatic water percentage contribution at vein  
22 formation temperatures of 420 °C, 350 °C and 300 °C, respectively.

23 Table DR2. SIMS  $\delta^{18}\text{O}$  values of magmatic zircon and quartz grains of the Rongmucuola  
24 pluton.

25 Table DR3. SIMS  $\delta^{18}\text{O}$  values of hydrothermal quartz from Qulong.

26 Figure DR1. Geological setting of the Lhasa terrane and deposit geology map of the Qulong  
27 porphyry Cu-Mo deposit. A) Simplified geological setting of the Lhasa terrane, Gangdese  
28 Magmatic Belt and Gangdese Porphyry Copper Deposits Belt. B) Geological map of the  
29 Qulong porphyry Cu-Mo deposit. C) Cross section showing the crosscutting relationship of  
30 the Miocene units of the Qulong porphyry Cu-Mo deposit. Simplified and revised from Zhao  
31 et al. (2016) and Li et al. (2017b).

32 Figure DR2. Plot of  $\delta^{18}\text{O}_{(\text{quartz})}$  vs.  $\delta^{18}\text{O}_{(\text{zircon})}$  of the Rongmucuola pluton at Qulong. The  
33 zircon and quartz grains are in equilibrium at  $\sim 674 \pm 151$  °C, which closely represent  
34 magmatic values. The equilibrium equation is from Trail et al. (2009). See text for details.

35 Figure DR3. Representative quartz veins, CL images of quartz grains and SIMS oxygen  
36 isotope data of the studied samples. A) Sinusoidal quartz vein represents the formation during  
37 the semi-solid crystalline state of the aplite intrusion before the main stage mineralization. B)  
38 CL images of quartz grains from A with positions of SIMS analysis; the green box highlights  
39 the resorption and dissolution of the CL-dark core, which is overprinted by CL-bright  
40 overgrowth rim. C) SIMS  $\delta^{18}\text{O}$  plot of the three transects in B. D) Main mineralization stage  
41 representative molybdenite bearing quartz vein. E) CL image of quartz grains selected from

42 D with positions of SIMS analysis. Insert shows quartz grains enclosing molybdenite grains  
43 used for CL imaging and SIMS analysis. F)  $\delta^{18}\text{O}$  plot of quartz grains from E showing  
44 homogeneous oxygen isotopic composition, with the  $\delta^{18}\text{O}$  values being independent of the  
45 presence/absence of micro-fractures. G) Sketch shows the sampling strategy to obtain fluid  
46 inclusion, Re-Os, and SIMS quartz oxygen isotopic data from the same vein. This figure is an  
47 expanded version of Figure 2 in the main text.

48 Figure DR4. Oxygen diffusion time and equilibrium time between quartz and water. A) Time  
49 for a 400  $\mu\text{m}$  quartz grain (diffusion distance is 200  $\mu\text{m}$ ) to reach complete oxygen diffusion  
50 exchange at different temperatures under hydrous conditions. The diffusion coefficient at 500  
51 and 400  $^{\circ}\text{C}$  are from Valley and Graham (1996) with the rest presented as interpolations. B)  
52 Growth time for a 400  $\mu\text{m}$  quartz grain at variable temperatures, and time needed for the  
53 grain to reach oxygen equilibrium with fluid at 300  $^{\circ}\text{C}$  with a salinity of 5.8 NaCl equiv. %,  
54 and mineral/water ratio of 5. Growth speed and the equilibrium time are from Pollington et al.  
55 (2016) and Cole et al. (1992), respectively.

56 Figure DR5. SIMS  $\delta^{18}\text{O}$  values of hydrothermal quartz (co-genetic with molybdenite)  
57 analyzed at Qulong, with an absolute timeframe determined by molybdenite Re-Os dating (Li  
58 et al., 2017a). Fluid  $\delta^{18}\text{O}$  values are calculated using formation temperatures determined from  
59 a fluid inclusion study (Li et al., 2017b). Fluid  $\delta^{18}\text{O}$  values are also calculated at hypothesized  
60 temperatures of at 420, 350 and 300  $^{\circ}\text{C}$ , which are the upper, average and lower limits of  
61 mineralization temperature at Qulong and PCD in general (Richards, 2011; Kouzmanov and  
62 Pokrovski, 2012). Also presented is the magmatic water percentage contribution at these  
63 variable temperatures. The  $\delta^{18}\text{O}_{\text{fluid}}$  and magmatic water contribution trends demonstrate the  
64 presence of three intermittent pulses, and show a continuous drop in the flux of magmatic

65 derived fluid during ore formation. This figure is an expanded version of Figure 3 in the main  
66 text.

## 67 **A2. Geological framework of Qulong**

68 Qulong is China's largest porphyry Cu-Mo deposit, containing 11 Mt of Cu and 0.6 Mt  
69 of Mo (Li et al., 2017b). The deposit geology has been extensively studied and is summarized  
70 here. The Qulong deposit occurs in the eastern Gangdese porphyry copper belt that hosts tens  
71 of porphyry copper systems (Fig. DR1A). The deposit geology is dominated by Jurassic  
72 volcanic/intrusive rocks and Miocene porphyries (Yang et al., 2009; Xiao et al., 2012; Hu et  
73 al., 2015; Zhao et al., 2016; Li et al., 2017a; Li et al., 2017b). The order of emplacement of  
74 the Mid-Miocene ore related intrusions is observed to be the pre-ore Rongmucuola  
75 monzogranite pluton, syn-ore aplite and monzogranite P porphyry, monzogranite X porphyry,  
76 and finally the post-ore quartz diorite (Fig. DR1B-C). In addition, a syn-ore hydrothermal  
77 breccia pipe, comprising two stages of breccia, developed following the emplacement of the  
78 X porphyry. High precision zircon U-Pb dating suggests that the Rongmucuola pluton, P  
79 porphyry and quartz-diorite were emplaced at  $17.142 \pm 0.023$  Ma (including  $^{238}\text{U}$  decay  
80 constant uncertainty),  $16.009 \pm 0.024$  Ma and  $15.166 \pm 0.020$  Ma, respectively (Li et al.,  
81 2017a).

82 The Cu-Mo mineralization at Qulong is predominately hosted by the western  
83 Rongmucuola pluton with a small portion of ore occurring in the Jurassic volcanic rocks (Fig.  
84 DR1B). Mineralization is spatially associated with potassic and, to a lesser extent, with  
85 propylitic and phyllic alteration assemblages (Yang et al., 2009; Li et al., 2017a; Li et al.,  
86 2017b). The potassic alteration assemblages are characterized by K-feldspar and biotite in the  
87 center of the deposit with the most intensive alteration spatially associated with the P  
88 porphyry and the north-south fault. Propylitic alteration assemblages are widely distributed in



the western Rongmucuola pluton and overprint the potassic alteration assemblages, which are best illustrated by the selective replacement of biotite and plagioclase by chlorite bearing selvages. Phyllic alteration assemblages are represented by the pervasive replacement of feldspar by fine-grained sericite and ultra-fine granular quartz, and occur ubiquitous in the western Rongmucuola pluton and overprint most of the potassic and propylitic alteration assemblages.

The main ore minerals are chalcopyrite and molybdenite which occur predominately in veinlets, which are classified as A-type, B-type and D-type veins, with B-type veins being the most abundant and hosting the majority of the Cu-Mo mineralization (Yang et al., 2009; Li et al., 2017a). Previous high precision Re-Os geochronology (Li et al., 2017a) demonstrates that the majority of metals at Qulong were precipitated within  $266 \pm 13$  kyrs between  $16.126 \pm 0.077$  and  $15.860 \pm 0.075$  Ma (including  $^{187}\text{Re}$  decay constant uncertainty). Coupling the high precision dating, vein types and cooling history indicates that the mineralization process comprise three short-lived (38 - 59 kyrs) pulses between  $16.126 \pm 0.008$  and  $16.050 \pm 0.005$  Ma,  $16.040 \pm 0.007$  and  $15.981 \pm 0.007$  Ma, and  $\sim 15.981 \pm 0.007$  and  $15.860 \pm 0.010$  Ma. With vein formation ages and temperatures constrained by molybdenite Re-Os dating and fluid inclusion analysis (Li et al., 2017a; Li et al., 2017b), respectively, the cooling rate of the Qulong hydrothermal system has been constrained to be  $0.55 \pm 0.11$  °C/kyr, with much faster cooling rates ( $\sim 1.2$  °C/kyr) for the individual mineralization pulses.

### **A3. Samples and analytical methods**

#### **A3.1 Samples**

The selected sample-set were quartz-molybdenite veinlets which have been previously studied in detail; with formation ages and temperatures (Table DR1) constrained by high

precision molybdenite Re-Os dating and fluid inclusion studies (Li et al., 2017a; Li et al., 2017b). The formation ages of these veins ( $n = 12$ ) were  $16.126 \pm 0.008$  Ma, ( $2\sigma$ , analytical uncertainty),  $16.107 \pm 0.015$  Ma,  $16.098 \pm 0.013$  Ma,  $16.088 \pm 0.007$  Ma,  $16.050 \pm 0.005$  Ma,  $16.040 \pm 0.007$  Ma,  $16.036 \pm 0.012$  Ma,  $16.011 \pm 0.015$  Ma,  $15.981 \pm 0.007$  Ma,  $15.943 \pm 0.007$  Ma,  $15.939 \pm 0.006$  Ma, and  $15.860 \pm 0.010$  Ma, with vein formation temperatures (trapping temperatures of fluid inclusion groups) of  $425 \pm 20$  °C,  $398 \pm 20$  °C,  $390 \pm 20$  °C,  $380 \pm 20$  °C,  $360 \pm 20$  °C,  $365 \pm 20$  °C,  $365 \pm 20$  °C,  $340 \pm 20$  °C,  $290 \pm 20$  °C,  $345 \pm 20$  °C,  $310 \pm 20$  °C,  $280 \pm 20$  °C, respectively.

Quartz grains closely associated with molybdenite grains from the parallel chips (Fig. DR3G) of the veinlets (Fig. 2B, Fig. DR3D) were recovered during the molybdenite separation process (Li et al., 2017a) for SIMS oxygen isotope analysis (Fig. DR3G). The textural association between the quartz and molybdenite (Fig. DR3D-E) and previous fluid inclusion study (Li et al., 2017b) suggested that these minerals were co-precipitated, which permit the linkage of the nature of the fluid recorded in the quartz to the timing of the ore (molybdenite)-forming process. To the best of our knowledge, this is the first approach evaluating the ore-forming fluid evolution path under an absolute timeframe.

A single sinusoidal quartz vein hosted by aplite (Fig. 2A, Fig. DR3A), which was formed before the main mineralization stage (Li et al., 2017b), was analyzed to evaluate the fluid nature prior to the main stage mineralization. Further, a total of 12 molybdenite bearing quartz veins (Table DR1) with Re-Os dates (Li et al., 2017a) were analyzed by CL and SIMS to yield successive generations of quartz and oxygen isotopic compositions, respectively. One vein (1605-211) from (Li et al., 2017a) was not analyzed due to the inability to conform the co-precipitated association between quartz grains and molybdenite samples.

To provide constraints on the oxygen isotopic composition of the original magmatic fluid during ore formation, magmatic zircon and quartz grains were separated from two fresh Rongmucuola monzogranite hand specimens, one from the west and the other from the east of the Rongmucuola pluton. The fresh samples from ore-bearing and barren parts of the pluton permitted the evaluation of potential variations of magmatic water oxygen isotopic composition during ore formation. The P porphyry was not used for this purpose as it has been intensive hydrothermally altered (Li et al., 2017a; Li et al., 2017b).

### **A3.2 Methods**

Following the recovery during molybdenite separation, the quartz grains were cleaned and mounted with the NBS-28 and Qinghu quartz standards in epoxy resin, polished and then coated with gold (Li et al., 2017c). CL imaging was conducted with a Hitachi SU-70 SEM at Durham University (Li et al., 2017c). The imaging conditions were 15 kv, 100 nA and 20 mm for accelerating voltage, beam current and working distance, respectively, under a high vacuum mode. Secondary electron images were taken using the same conditions, but at a beam current of 1 nA.

Quartz SIMS oxygen isotope analysis was carried out at the Institute of Geology and Geophysics, Chinese Academy of Sciences with a CAMECA IMS-1280 SIMS (Li et al., 2010). The  $\text{Cs}^+$  primary ion beam was accelerated at 10 kV, with an intensity of ca. 2 nA and rastered over a 20  $\mu\text{m}$  area. The spot size as an ellipse was  $\sim 10 \times 20 \mu\text{m}$  in diameter. Oxygen isotopes were measured using multi-collection mode on two off-axis Faraday cups, with the intensity of  $^{16}\text{O}$  was typically  $10^9$  cps during this study. The instrumental mass fractionation factor (IMF) was corrected using NBS-28 with a  $\delta^{18}\text{O}$  value (VSMOW) of 9.5 ‰ (Matsuhisa, 1974). Measured  $^{18}\text{O}/^{16}\text{O}$  ratios were normalized to the VSMOW composition ( $^{18}\text{O}/^{16}\text{O} = 0.0020052$ ), and then corrected for the IMF. The uncertainty on individual analysis was

usually better than 0.3 - 0.4 ‰ (2SE). The studied samples were run during the same period of a previous study (Li et al., 2017c), and the long-term drift during the course of study was monitored by analyzing the Qinghu quartz standard between samples. The Qinghu standard yields  $\delta^{18}\text{O}$  values between  $8.34 \pm 0.23$  and  $8.92 \pm 0.37$  ‰ (Li et al., 2017c), with a mean of  $8.64 \pm 0.28$  ‰ (2SD, n = 41). For each analysed quartz vein, CL images and the distribution of  $\delta^{18}\text{O}$  values are used to evaluate the potential presence of recognizable multiple growth history. The analyzed positions are re-checked under a microscope, and analyses with the presence of inclusions or offset from the target, e.g., away from the growth zonation, are omitted. When single quartz growth history was demonstrated, e.g., no presence of dissolution/resorption textures and homogeneous  $\delta^{18}\text{O}$  values (e.g., Fig. 3, see below for further details), it is interpreted that the weighted mean of the  $\delta^{18}\text{O}$  values represents the best estimate of the  $\delta^{18}\text{O}$  value of that vein.

Experimentally determined quartz-water oxygen isotope fractionation equation (equations 1 and 2) (Matsuhisa et al., 1979) was used to calculate the  $\delta^{18}\text{O}$  values of ore-forming fluid ( $\delta^{18}\text{O}_{\text{fluid}}$ ). For fractionation calculation, hydrothermal and magmatic quartz formation temperatures (T in unit of °C) were constrained by a previous quartz (molybdenite bearing quartz veins) fluid inclusion study (Li et al., 2017b) and quartz-zircon equilibrium oxygen isotope fractionation, respectively. Uncertainties of the  $\delta^{18}\text{O}_{\text{fluid}}$  values were calculated with propagation of uncertainties from  $\delta^{18}\text{O}_{\text{quartz}}$  measurements and fluid inclusion homogenization temperatures ( $\pm 20$  °C) by Monte Carlo simulation.

$$\delta^{18}\text{O}_{\text{quartz}} - \delta^{18}\text{O}_{\text{fluid}} = 3.34 * (10^6 / (T + 273.15)^2) - 3.31 \quad 250\text{ °C} < T < 500\text{ °C} \quad (1)$$

$$\delta^{18}\text{O}_{\text{quartz}} - \delta^{18}\text{O}_{\text{fluid}} = 2.05 * (10^6 / (T + 273.15)^2) - 1.14 \quad 500\text{ °C} < T < 800\text{ °C} \quad (2)$$

To evaluate the percentage contribution (R) of magmatic water in the hydrothermal system, a binary mixing model with end members of meteoric water ( $\delta^{18}\text{O}_{\text{meteoric}}$ ) and magmatic water ( $\delta^{18}\text{O}_{\text{magmatic}}$ ), as presented in equation 3, was used.

$$\delta^{18}\text{O}_{\text{fluid}} = \delta^{18}\text{O}_{\text{magmatic}} * R + \delta^{18}\text{O}_{\text{meteoric}} * (1-R) \quad (3)$$

#### **A4. Oxygen isotope equilibrium time between water and quartz**

Here we further adjust the oxygen isotope equilibrium time between quartz and water. There is a lack of direct experimental studies to quantify the oxygen isotope exchange rate between quartz and water. Using the experimental study of a granite-fluid system (water/mineral ratio of 5, salinity of 5.8 wt. % NaCl equiv. and containing >22.6 wt. % quartz) as an alternative, with quartz of an average grain size of 0.4 cm (radius is 0.2 cm), oxygen isotope equilibrium can be achieved within 20 years (Fig. DR4B) at 300 °C (Cole et al., 1992). The experimental study further predicts a reduction in the equilibrium time with increased temperature, fluid salinity and water/mineral ratio.

A previous fluid inclusion study (Li et al., 2017b) suggests that the hydrothermal fluids at Qulong have formation temperatures of between 425 and 280 °C (average = 340 °C) with salinities of >5 wt. % NaCl equiv. (Table DR1). Considering the average Cu concentration in porphyry ore-forming fluid is ~0.1 wt.% (Landtwing et al., 2005; Kouzmanov and Pokrovski, 2012), the minimum volume of hydrothermal fluids to deposit the 11 Mt Cu at Qulong is  $>1.1 \times 10^{10} \text{ m}^3$  assuming that the dissolved metals can be sufficiently and completely deposited. The Qulong deposit contains 2200 Mt of ore (Li et al., 2017b), which is equal to a volume of  $\sim 8 \times 10^8 \text{ m}^3$ . The vein volume density in porphyry deposits is suggested to vary between 5 and 10 % in the ore shells (Weis et al., 2012), as such the maximum quartz volume at Qulong is estimated to be  $8 \times 10^7 \text{ m}^3$ . The minimum fluid volume and maximum quartz

volume estimated above suggest a minimum water/quartz ratio of 10 for Qulong. As discussed above, the growth temperature, fluid salinity and water/mineral ratio of hydrothermal quartz grains at Qulong (425 – 280 °C, >5 wt. %, 10) are favorable for the vein quartz to reach oxygen equilibrium with fluid if their growth time is longer than 20 years.

## A5. References

- Cole, D. R., Ohmoto, H., and Jacobs, G. K., 1992, Isotopic exchange in mineral-fluid systems: III. Rates and mechanisms of oxygen isotope exchange in the system granite-H<sub>2</sub>O ± NaCl ± KCl at hydrothermal conditions: *Geochimica et Cosmochimica Acta*, v. 56, no. 1, p. 445-466.
- Hu, Y. B., Liu, J. Q., Ling, M. X., Ding, W., Liu, Y., Zartman, R. E., Ma, X. F., Liu, D. Y., Zhang, C. C., Sun, S. J., Zhang, L. P., Wu, K., and Sun, W. D., 2015, The formation of Qulong adakites and their relationship with porphyry copper deposit: *Geochemical constraints: Lithos*, v. 220, no. 0, p. 60-80.
- Kouzmanov, K., and Pokrovski, G. S., 2012, Hydrothermal controls on metal distribution in porphyry Cu (-Mo-Au) systems: *Special Publication of the Society of Economic Geologists*, v. 16, no. 22, p. 573–618.
- Landtwing, M. R., Pettke, T., Halter, W. E., Heinrich, C. A., Redmond, P. B., Einaudi, M. T., and Kunze, K., 2005, Copper deposition during quartz dissolution by cooling magmatic–hydrothermal fluids: The Bingham porphyry: *Earth and Planetary Science Letters*, v. 235, no. 1–2, p. 229-243.
- Li, X. H., Li, W. X., Li, Q. L., Wang, X. C., Liu, Y., and Yang, Y. H., 2010, Petrogenesis and tectonic significance of the similar to 850 Ma Gangbian alkaline complex in South China: Evidence from in situ zircon U-Pb dating, Hf-O isotopes and whole-rock geochemistry: *Lithos*, v. 114, no. 1-2, p. 1-15.
- Li, Y., Selby, D., Condon, D., and Tapster, S., 2017a, Cyclic magmatic-hydrothermal evolution in porphyry systems: High-precision U-Pb and Re-Os geochronology constraints from the Tibetan Qulong porphyry Cu-Mo deposit: *Economic Geology*, v. 112, no. 6.
- Li, Y., Selby, D., Feely, M., Costanzo, A., and Li, X.-H., 2017b, Fluid inclusion characteristics and molybdenite Re-Os geochronology of the Qulong porphyry copper-molybdenum deposit, Tibet: *Mineralium Deposita*, v. 52, no. 2, p. 137–158.
- Li, Y., Li, J. W., Li, X. H., Selby, D., Huang, G. H., Chen, L. J., and Zheng, K., 2017c, An Early Cretaceous carbonate replacement origin for the Xinqiao stratabound massive sulfide deposit, Middle-Lower Yangtze Metallogenic Belt, China: *Ore Geology Reviews*, v. 80, p. 985-1003.
- Matsuhisa, Y., 1974, <sup>18</sup>O/<sup>16</sup>O ratios for NBS-28 and some silicate reference samples: *Geochem. J.*, v. 8, p. 103-107.
- Matsuhisa, Y., Goldsmith, J. R., and Clayton, R. N., 1979, Oxygen Isotopic Fractionation in the System Quartz-Albite-Anorthite-Water: *Geochimica Et Cosmochimica Acta*, v. 43, no. 7, p. 1131-1140.
- Pollington, A. D., Kozdon, R., Anovitz, L. M., Georg, R. B., Spicuzza, M. J., and Valley, J. W., 2016, Experimental calibration of silicon and oxygen isotope fractionations between quartz and water at 250°C by in situ microanalysis of experimental products

247 and application to zoned low  $\delta^{30}\text{Si}$  quartz overgrowths: *Chemical Geology*, v. 421, p.  
 248 127-142.

249 Richards, J. P., 2011, Magmatic to hydrothermal metal fluxes in convergent and collided  
 250 margins: *Ore Geology Reviews*, v. 40, no. 1, p. 1-26.

251 Trail, D., Bindeman, I. N., Watson, E. B., and Schmitt, A. K., 2009, Experimental calibration  
 252 of oxygen isotope fractionation between quartz and zircon: *Geochimica Et*  
 253 *Cosmochimica Acta*, v. 73, no. 23, p. 7110-7126.

254 Valley, J. W., and Graham, C. M., 1996, Ion microprobe analysis of oxygen isotope ratios in  
 255 quartz from Skye granite: Healed micro-cracks, fluid flow, and hydrothermal  
 256 exchange: *Contributions to Mineralogy and Petrology*, v. 124, no. 3-4, p. 225-234.

257 Weis, P., Driesner, T., and Heinrich, C. A., 2012, Porphyry-copper ore shells form at stable  
 258 pressure-temperature fronts within dynamic fluid plumes: *Science*, v. 338, no. 6114, p.  
 259 1613-1616.

260 Xiao, B., Qin, K. Z., Li, G. M., Li, J. X., Xia, D. X., Chen, L., and Zhao, J. X., 2012, Highly  
 261 Oxidized Magma and Fluid Evolution of Miocene Qulong Giant Porphyry Cu-Mo  
 262 Deposit, Southern Tibet, China: *Resource Geology*, v. 62, no. 1, p. 4-18.

263 Yang, Z. M., Hou, Z. Q., White, N. C., Chang, Z. S., Li, Z. Q., and Song, Y. C., 2009,  
 264 Geology of the post-collisional porphyry copper-molybdenum deposit at Qulong,  
 265 Tibet: *Ore Geology Reviews*, v. 36, no. 1-3, p. 133-159.

266 Zhao, J. X., Qin, K. Z., Xiao, B., McInnes, B., Li, G. M., Evans, N., Cao, M. J., and Li, J. X.,  
 267 2016, Thermal history of the giant Qulong Cu-Mo deposit, Gangdese metallogenic  
 268 belt, Tibet: Constraints on magmatic-hydrothermal evolution and exhumation:  
 269 *Gondwana Research*, v. 36, p. 390-409.

270

# Figure DR1

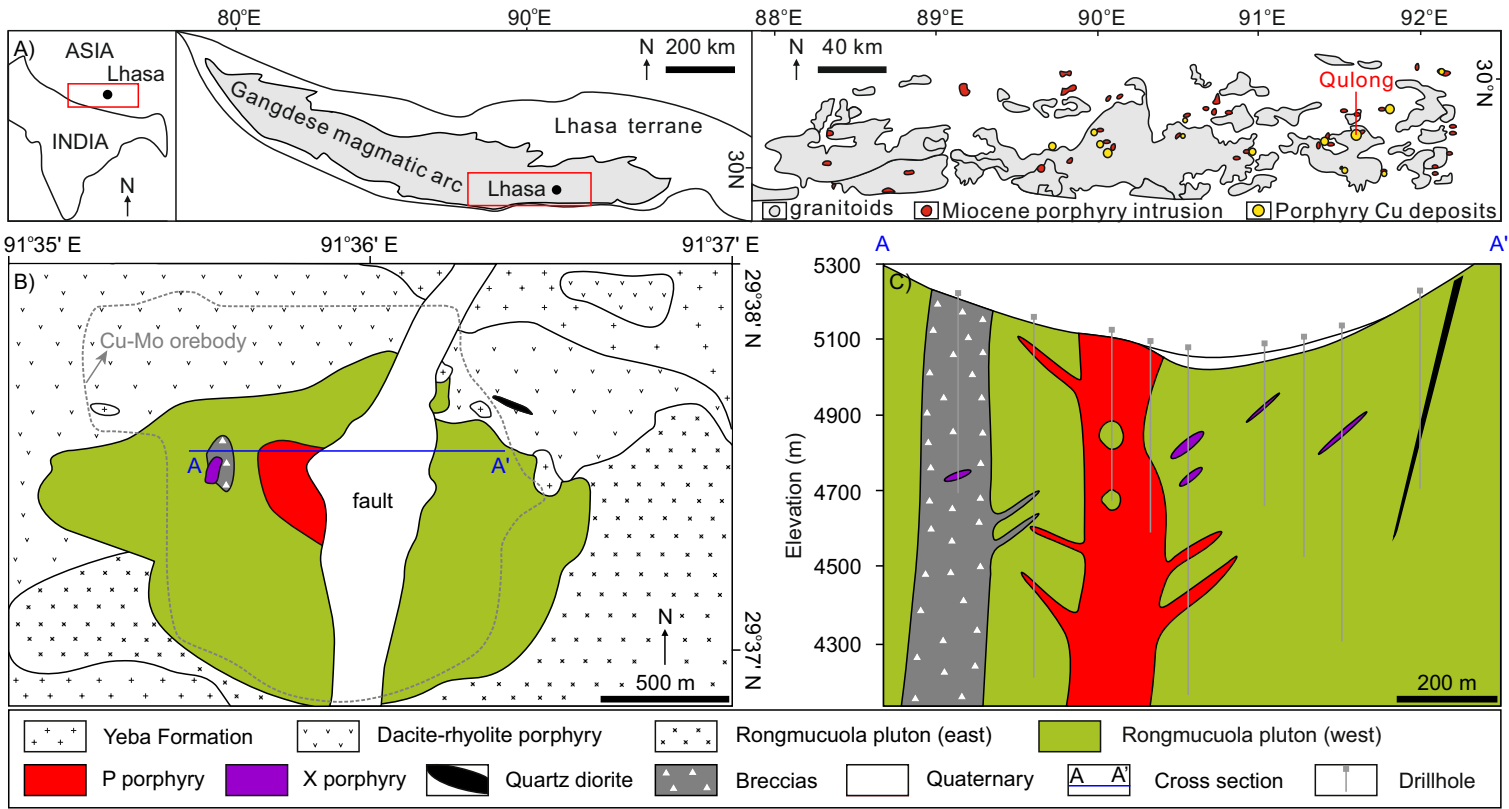



Figure DR2

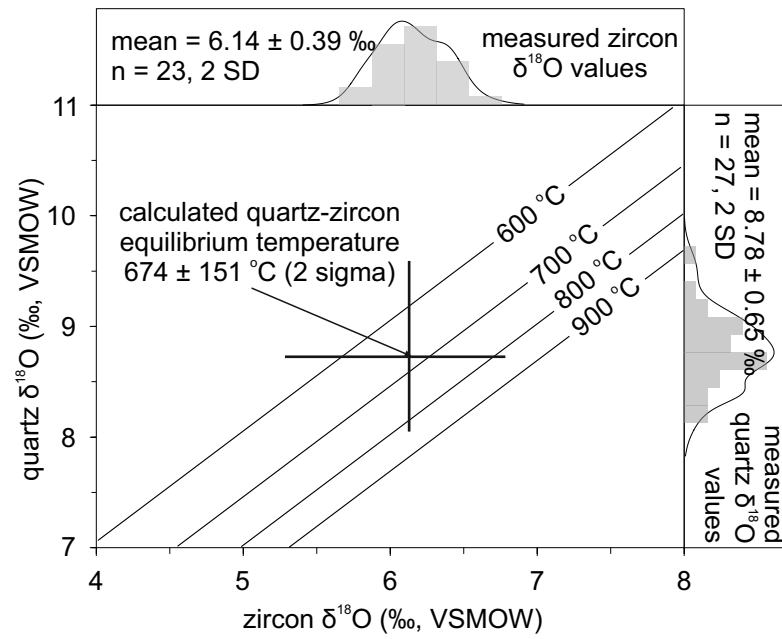

# Figure DR3

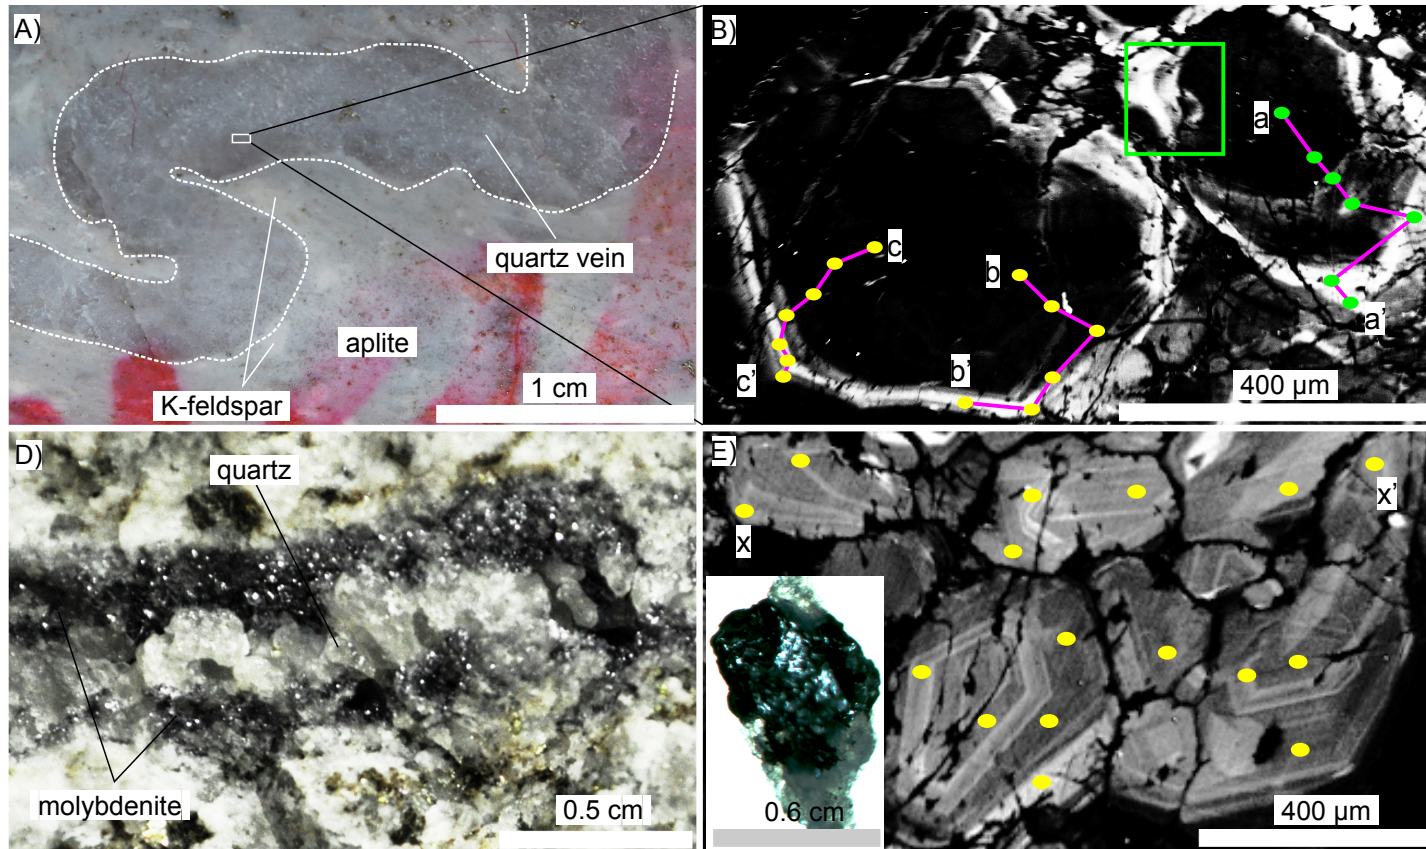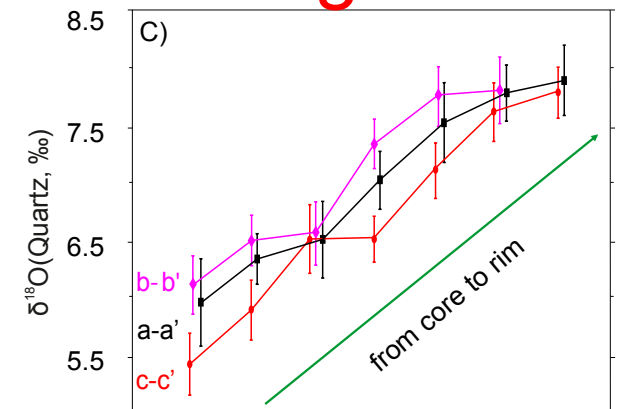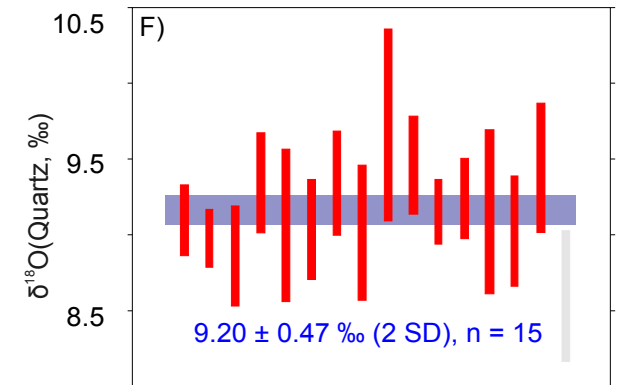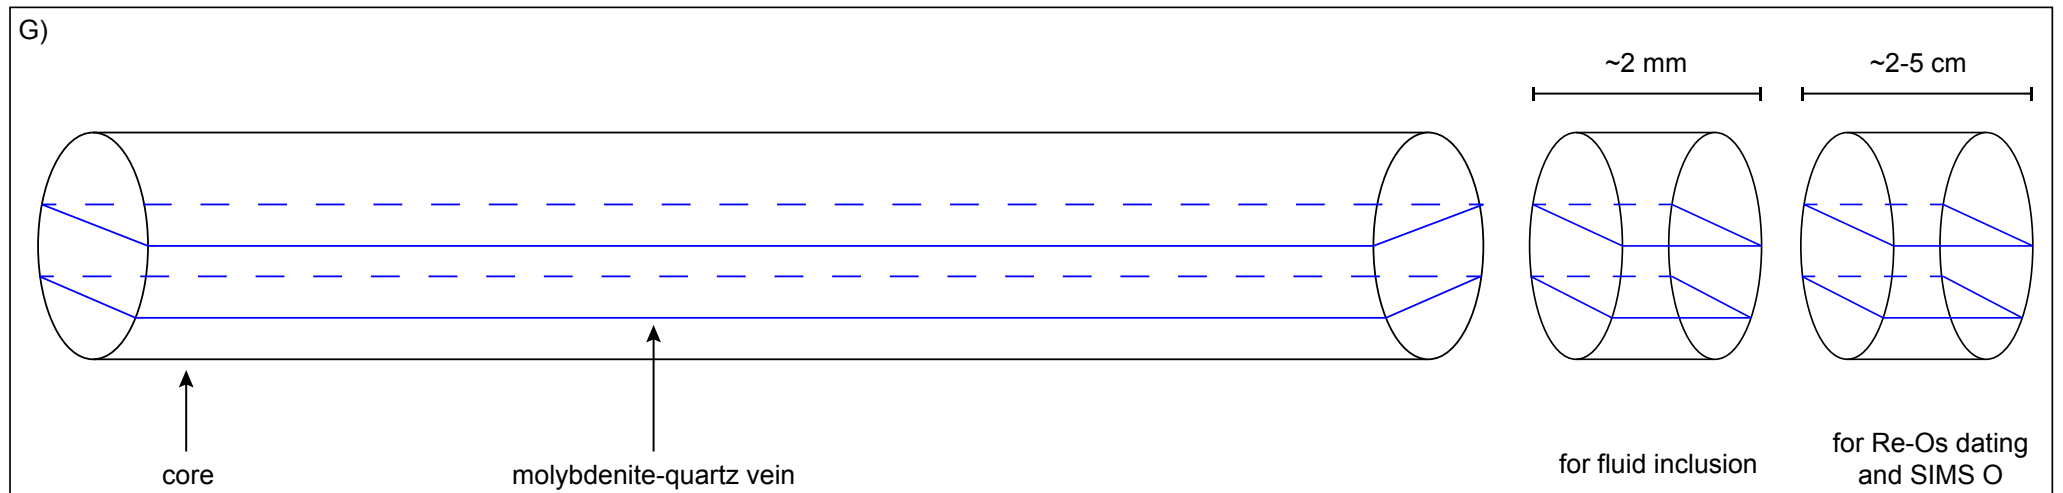

# Figure DR4

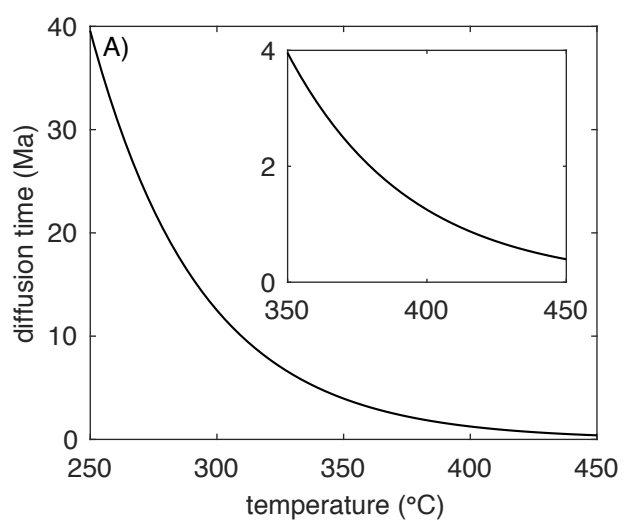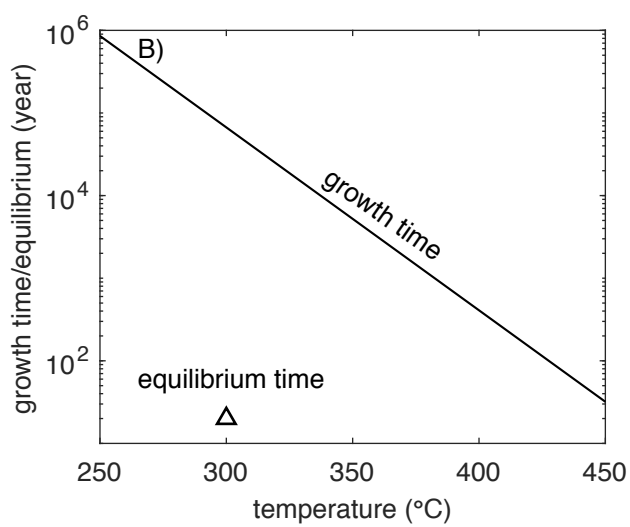

# Figure DR5

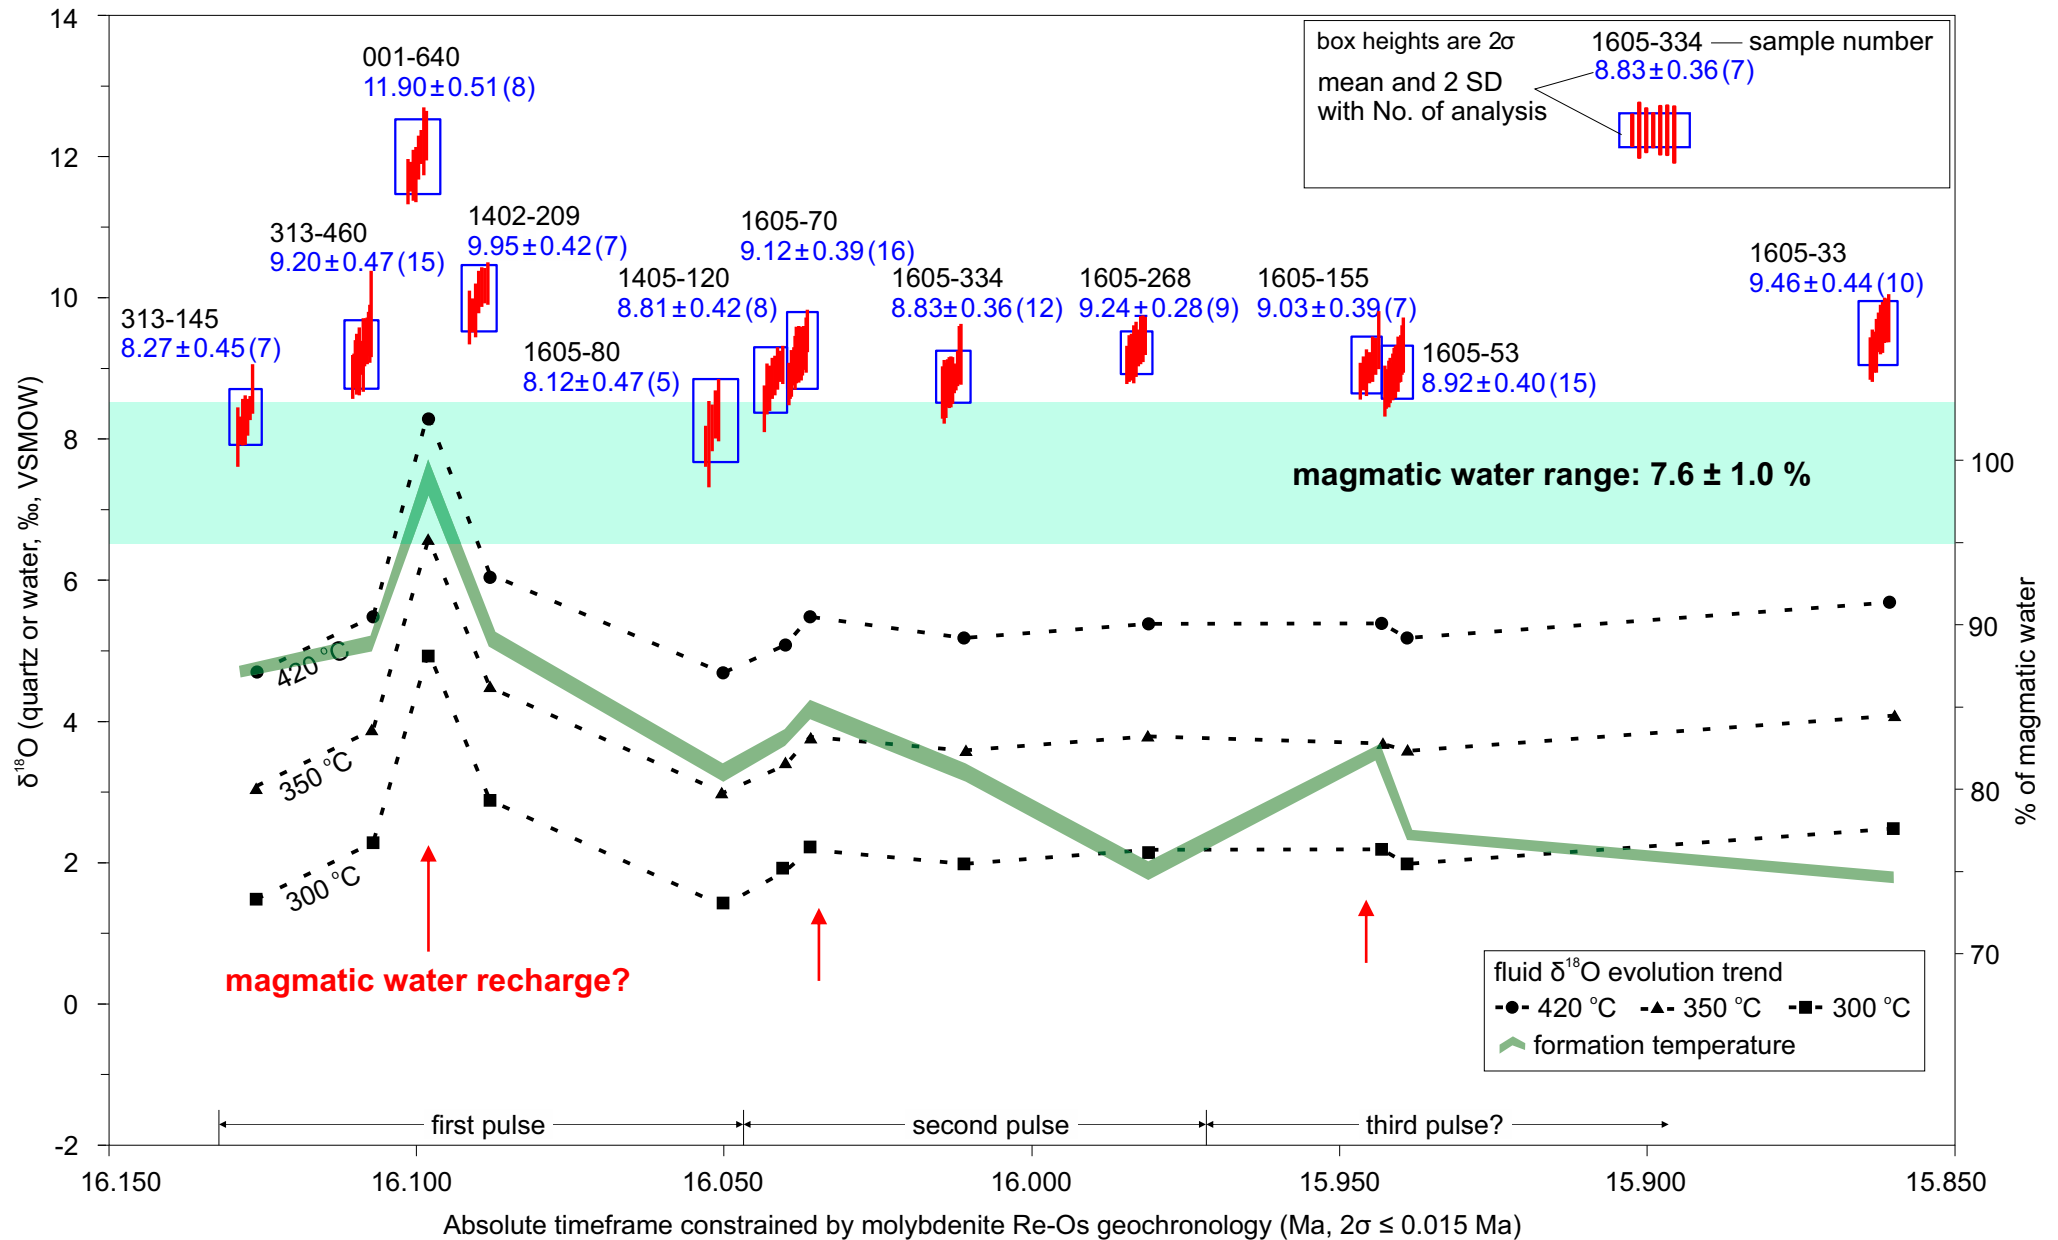

Table DR1. Oxygen isotopic composition of quartz grains enclosed by molybdenite, with estimations of fluid  $\delta^{18}\text{O}$  and magmatic water contribution

| Sample No. | Formation age <sup>1</sup> |       | Formation Temperature <sup>2</sup> | $\delta^{18}\text{O}_{\text{quartz}}$ |       | $\delta^{18}\text{O}_{\text{fluid}}$ with formation T and magmatic water % <sup>3</sup> |     |                                      |       |          | $\delta^{18}\text{O}_{\text{fluid}}$ and magmatic % with upper, average and lower limit mineralization temperatures <sup>4</sup> |                                      |         |             |     |                                      |             |          |         |
|------------|----------------------------|-------|------------------------------------|---------------------------------------|-------|-----------------------------------------------------------------------------------------|-----|--------------------------------------|-------|----------|----------------------------------------------------------------------------------------------------------------------------------|--------------------------------------|---------|-------------|-----|--------------------------------------|-------------|----------|---------|
|            |                            |       |                                    |                                       |       |                                                                                         |     |                                      |       |          | 420 ± 20 °C                                                                                                                      |                                      |         | 350 ± 20 °C |     |                                      | 300 ± 20 °C |          |         |
|            |                            |       |                                    | $\delta^{18}\text{O}_{\text{fluid}}$  |       | magmatic water %                                                                        |     | $\delta^{18}\text{O}_{\text{fluid}}$ |       | magmatic |                                                                                                                                  | $\delta^{18}\text{O}_{\text{fluid}}$ |         | magmatic    |     | $\delta^{18}\text{O}_{\text{fluid}}$ |             | magmatic |         |
|            | Ma                         | 2σ    | °C                                 | 2σ                                    | ‰     | 2σ                                                                                      | ‰   | 2σ                                   | value | 2σ       | ‰                                                                                                                                | 2σ                                   | water % | ‰           | 2σ  | water %                              | ‰           | 2σ       | water % |
| 313-145    | 16.126                     | 0.008 | 425                                | 20                                    | 8.27  | 0.45                                                                                    | 4.7 | 0.6                                  | 88%   | 5%       | 4.6                                                                                                                              | 0.6                                  | 87%     | 3.0         | 0.7 | 80%                                  | 1.4         | 0.8      | 73%     |
| 313-460    | 16.107                     | 0.015 | 398                                | 20                                    | 9.20  | 0.47                                                                                    | 5.1 | 0.6                                  | 89%   | 5%       | 5.6                                                                                                                              | 0.6                                  | 91%     | 3.9         | 0.7 | 84%                                  | 2.3         | 0.9      | 77%     |
| 001-640    | 16.098                     | 0.013 | 390                                | 20                                    | 11.90 | 0.51                                                                                    | 7.6 | 0.7                                  | 100%  | 5%       | 8.3                                                                                                                              | 0.6                                  | 103%    | 6.6         | 0.8 | 96%                                  | 5.0         | 0.9      | 89%     |
| 1402-209   | 16.088                     | 0.007 | 380                                | 20                                    | 9.95  | 0.42                                                                                    | 5.4 | 0.6                                  | 91%   | 5%       | 6.3                                                                                                                              | 0.6                                  | 94%     | 4.7         | 0.7 | 87%                                  | 3.1         | 0.8      | 80%     |
| 1605-80    | 16.050                     | 0.005 | 360                                | 20                                    | 8.12  | 0.47                                                                                    | 3.1 | 0.7                                  | 81%   | 6%       | 4.5                                                                                                                              | 0.6                                  | 87%     | 2.8         | 0.7 | 79%                                  | 1.3         | 0.9      | 73%     |
| 1405-120   | 16.040                     | 0.007 | 365                                | 20                                    | 8.81  | 0.42                                                                                    | 3.9 | 0.7                                  | 84%   | 5%       | 5.2                                                                                                                              | 0.6                                  | 90%     | 3.5         | 0.7 | 82%                                  | 1.9         | 0.8      | 76%     |
| 1605-70    | 16.036                     | 0.012 | 365                                | 20                                    | 9.12  | 0.39                                                                                    | 4.2 | 0.6                                  | 85%   | 5%       | 5.5                                                                                                                              | 0.6                                  | 91%     | 3.8         | 0.7 | 84%                                  | 2.3         | 0.8      | 77%     |
| 1605-334   | 16.011                     | 0.015 | 340                                | 20                                    | 8.83  | 0.36                                                                                    | 3.2 | 0.7                                  | 81%   | 6%       | 5.2                                                                                                                              | 0.5                                  | 90%     | 3.5         | 0.7 | 82%                                  | 2.0         | 0.8      | 76%     |
| 1605-268   | 15.981                     | 0.007 | 290                                | 20                                    | 9.24  | 0.28                                                                                    | 2.0 | 0.8                                  | 76%   | 6%       | 5.6                                                                                                                              | 0.5                                  | 91%     | 3.9         | 0.6 | 84%                                  | 2.4         | 0.8      | 77%     |
| 1605-155   | 15.943                     | 0.007 | 345                                | 20                                    | 9.03  | 0.39                                                                                    | 3.6 | 0.7                                  | 83%   | 5%       | 5.4                                                                                                                              | 0.6                                  | 90%     | 3.7         | 0.7 | 83%                                  | 2.2         | 0.8      | 76%     |
| 1605-53    | 15.939                     | 0.006 | 310                                | 20                                    | 8.92  | 0.40                                                                                    | 2.4 | 0.8                                  | 78%   | 6%       | 5.3                                                                                                                              | 0.6                                  | 90%     | 3.6         | 0.7 | 83%                                  | 2.1         | 0.8      | 76%     |
| 1605-33    | 15.860                     | 0.010 | 280                                | 20                                    | 9.46  | 0.44                                                                                    | 1.8 | 0.9                                  | 75%   | 6%       | 5.8                                                                                                                              | 0.6                                  | 92%     | 4.2         | 0.7 | 85%                                  | 2.6         | 0.8      | 78%     |

1. Formation ages are constrained by molybdenite Re-Os geochronology from Li et al., 2017a.

2. Formation temperatures are constrained by trapping T of fluid inclusion group from the parellel wafers of the veins Li et al., 2017b.

3. Magmaic water and meteoric water  $\delta^{18}\text{O}$  values are  $7.6 \pm 1.0$  ‰ (this study) and  $-15.6 \pm 3.6$  ‰ (Currie et al., 2005), respectively.

4. To test the robustness of the temperatures used for oxygen isotope calculation, the uper, average and lower limit of mineralization temperatures represent mineralization temperature variations at Qulong and typical PCDs are used for testing.

Table DR2. SIMS  $\delta^{18}\text{O}$  values of zircon and groundmass quartz of the Rongmucuola pluton

| Sample NO.           | $\delta^{18}\text{O}$ | $2\sigma$ | Mean and 2 SD (‰, VSMOW)                     |                                              |
|----------------------|-----------------------|-----------|----------------------------------------------|----------------------------------------------|
| <i>Zircon sample</i> |                       |           |                                              |                                              |
| QL14_23W@1           | 6.43                  | 0.19      | QL14_23W<br>Mean = $6.14 \pm 0.46$ , n = 11. |                                              |
| QL14_23W@2           | 6.00                  | 0.18      |                                              |                                              |
| QL14_23W@3           | 5.82                  | 0.16      |                                              |                                              |
| QL14_23W@5           | 5.92                  | 0.28      |                                              |                                              |
| QL14_23W@6           | 6.44                  | 0.21      |                                              |                                              |
| QL14_23W@7           | 6.37                  | 0.17      |                                              |                                              |
| QL14_23W@8           | 5.80                  | 0.26      |                                              |                                              |
| QL14_23W@9           | 6.10                  | 0.26      |                                              |                                              |
| QL14_23W@10          | 6.28                  | 0.25      |                                              |                                              |
| QL14_23W@11          | 6.16                  | 0.32      |                                              |                                              |
| QL14_23W@12          | 6.19                  | 0.29      | QL14_23W + QL14_52E                          |                                              |
| QL14_52E@1           | 6.17                  | 0.26      | QL14_52E<br>Mean = $6.14 \pm 0.39$ , n = 23. |                                              |
| QL14_52E@2           | 5.99                  | 0.21      |                                              |                                              |
| QL14_52E@3           | 6.12                  | 0.22      |                                              |                                              |
| QL14_52E@4           | 6.01                  | 0.32      |                                              |                                              |
| QL14_52E@5           | 5.99                  | 0.27      |                                              |                                              |
| QL14_52E@6           | 6.55                  | 0.29      |                                              |                                              |
| QL14_52E@7           | 6.01                  | 0.29      |                                              |                                              |
| QL14_52E@10          | 6.18                  | 0.25      |                                              |                                              |
| QL14_52E@11          | 6.21                  | 0.32      |                                              |                                              |
| QL14_52E@12          | 5.94                  | 0.42      |                                              |                                              |
| QL14_52E@13          | 6.50                  | 0.45      |                                              |                                              |
| QL14_52E@14          | 6.13                  | 0.23      |                                              |                                              |
| QL14_52E@15          | 6.38                  | 0.22      |                                              |                                              |
| <i>quartz sample</i> |                       |           |                                              |                                              |
| QL14_23W@1           | 8.49                  | 0.36      |                                              | QL14_23W<br>Mean = $8.83 \pm 0.83$ , n = 12. |
| QL14_23W@3           | 9.12                  | 0.22      |                                              |                                              |
| QL14_23W@4           | 8.95                  | 0.29      |                                              |                                              |
| QL14_23W@5           | 8.45                  | 0.29      |                                              |                                              |
| QL14_23W@8           | 9.05                  | 0.33      |                                              |                                              |
| QL14_23W@9           | 9.99                  | 0.22      |                                              |                                              |
| QL14_23W@10          | 8.74                  | 0.25      |                                              |                                              |
| QL14_23W@11          | 8.87                  | 0.30      |                                              |                                              |
| QL14_23W@12          | 9.38                  | 0.46      |                                              |                                              |
| QL14_23W@13          | 8.79                  | 0.30      |                                              |                                              |
| QL14_23W@14          | 9.56                  | 0.31      |                                              |                                              |
| QL14_23W@15          | 8.40                  | 0.16      | QL14_23W + QL14_52E                          |                                              |
| QL14_23W@16          | 8.16                  | 0.36      | QL14_52E<br>Mean = $8.74 \pm 0.48$ , n = 15. |                                              |
| QL14_52E@2           | 8.69                  | 0.21      |                                              |                                              |
| QL14_52E@3           | 8.60                  | 0.35      |                                              |                                              |
| QL14_52E@4           | 8.96                  | 0.31      |                                              |                                              |
| QL14_52E@5           | 8.97                  | 0.35      |                                              |                                              |
| QL14_52E@7           | 7.03                  | 0.27      |                                              |                                              |
| QL14_52E@10          | 8.91                  | 0.32      |                                              |                                              |
| QL14_52E@11          | 8.59                  | 0.35      |                                              |                                              |
| QL14_52E@12          | 8.70                  | 0.50      |                                              |                                              |
| QL14_52E@13          | 9.21                  | 0.39      |                                              |                                              |
| QL14_52E@15          | 9.68                  | 0.22      |                                              |                                              |
| QL14_52E@16          | 8.93                  | 0.28      |                                              |                                              |
| QL14_52E@17          | 8.71                  | 0.32      |                                              |                                              |
| QL14_52E@18          | 8.60                  | 0.29      |                                              |                                              |
| QL14_52E@19          | 8.73                  | 0.29      |                                              |                                              |
| QL14_52E@20          | 8.38                  | 0.22      |                                              |                                              |
| QL14_52E@21          | 8.26                  | 0.31      |                                              |                                              |
| QL14_52E@22          | 8.81                  | 0.35      | Mean = $8.78 \pm 0.65$ , n = 27.             |                                              |

QL14\_23W and QL14\_52E are relative fresh samples from the west and east of the Rongmucuola pluton, respectively.

Data do not belong to the main population are rejected (with strikethrough) and are not used for mean value calculations

Table DR3. SIMS  $\delta^{18}\text{O}$  values of hydrothermal quartz from Qulong

| Sample No.                         | $\delta^{18}\text{O}$ | $2\sigma$ |         |      |
|------------------------------------|-----------------------|-----------|---------|------|
| <i>Sinusoidal like quartz vein</i> |                       |           |         |      |
| <i>Section A</i>                   |                       |           |         |      |
| 817-290@A1                         | 5.95                  | 0.38      |         |      |
| 817-290@A2                         | 6.33                  | 0.22      |         |      |
| 817-290@A3                         | 6.50                  | 0.33      |         |      |
| 817-290@A4                         | 7.01                  | 0.25      |         |      |
| 817-290@A5                         | 7.52                  | 0.35      |         |      |
| 817-290@A6                         | 7.78                  | 0.24      |         |      |
| 817-290@A7                         | 7.89                  | 0.31      |         |      |
| <i>Section B</i>                   |                       |           |         |      |
| 817-290@B1                         | 6.11                  | 0.26      |         |      |
| 817-290@B2                         | 6.49                  | 0.22      |         |      |
| 817-290@B3                         | 6.55                  | 0.28      |         |      |
| 817-290@B4                         | 7.33                  | 0.22      |         |      |
| 817-290@B5                         | 7.75                  | 0.27      |         |      |
| 817-290@B6                         | 7.80                  | 0.29      |         |      |
| <i>Section C</i>                   |                       |           |         |      |
| 817-290@C1                         | 5.40                  | 0.27      |         |      |
| 817-290@C2                         | 5.88                  | 0.26      |         |      |
| 817-290@C3                         | 6.49                  | 0.30      |         |      |
| 817-290@C4                         | 6.50                  | 0.20      |         |      |
| 817-290@C5                         | 7.10                  | 0.24      |         |      |
| 817-290@C6                         | 7.61                  | 0.26      |         |      |
| 817-290@C7                         | 7.78                  | 0.22      |         |      |
| Molybdenite bearing veins          |                       |           |         |      |
| Sample No.                         | $\delta^{18}\text{O}$ | $2\sigma$ | average | 2 SD |
| 313-145@1                          | 8.09                  | 0.20      | 8.27    | 0.45 |
| 313-145@2                          | 8.41                  | 0.17      | n=7     |      |
| 313-145@4                          | 8.00                  | 0.42      |         |      |
| 313-145@5                          | 8.28                  | 0.26      |         |      |
| 313-145@6                          | 8.21                  | 0.33      |         |      |
| 313-145@9                          | 8.24                  | 0.35      |         |      |
| 313-145@10                         | 8.68                  | 0.35      |         |      |
| 313-460@1                          | 9.10                  | 0.22      | 9.20    | 0.47 |
| 313-460@2                          | 8.99                  | 0.19      | n=15    |      |

|             |       |      |       |      |
|-------------|-------|------|-------|------|
| 313-460@3   | 8.85  | 0.31 |       |      |
| 313-460@4   | 9.36  | 0.32 |       |      |
| 313-460@5   | 9.07  | 0.48 |       |      |
| 313-460@6   | 9.05  | 0.32 |       |      |
| 313-460@7   | 9.36  | 0.33 |       |      |
| 313-460@8   | 9.03  | 0.43 |       |      |
| 313-460@9   | 9.74  | 0.61 |       |      |
| 313-460@10  | 9.46  | 0.31 |       |      |
| 313-460@11  | 9.16  | 0.20 |       |      |
| 313-460@12  | 9.25  | 0.25 |       |      |
| 313-460@13  | 9.16  | 0.52 |       |      |
| 313-460@14  | 9.03  | 0.34 |       |      |
| 313-460@15  | 9.46  | 0.41 |       |      |
| <hr/>       |       |      |       |      |
| 001-640@1   | 12.10 | 0.24 | 11.90 | 0.51 |
| 001-640@2   | 12.26 | 0.35 | n=8   |      |
| 001-640@4   | 11.68 | 0.21 |       |      |
| 001-640@5   | 11.71 | 0.39 |       |      |
| 001-640@7   | 12.18 | 0.48 |       |      |
| 001-640@8   | 11.61 | 0.32 |       |      |
| 001-640@9   | 11.95 | 0.31 |       |      |
| 001-640@10  | 11.70 | 0.36 |       |      |
| <hr/>       |       |      |       |      |
| 1402-209@1  | 10.17 | 0.30 | 9.95  | 0.42 |
| 1402-209@3  | 9.79  | 0.38 | n=7   |      |
| 1402-209@4  | 9.69  | 0.38 |       |      |
| 1402-209@5  | 9.72  | 0.24 |       |      |
| 1402-209@8  | 10.14 | 0.25 |       |      |
| 1402-209@9  | 10.12 | 0.28 |       |      |
| 1402-209@11 | 10.05 | 0.30 |       |      |
| <hr/>       |       |      |       |      |
| 1605-80@2   | 7.87  | 0.29 | 8.12  | 0.47 |
| 1605-80@3   | 8.32  | 0.34 | n=5   |      |
| 1605-80@5   | 7.90  | 0.61 |       |      |
| 1605-80@6   | 8.13  | 0.33 |       |      |
| 1605-80@8   | 8.38  | 0.44 |       |      |
| <hr/>       |       |      |       |      |
| 1405-120@1  | 8.69  | 0.32 | 8.81  | 0.42 |
| 1405-120@2  | 8.40  | 0.33 | n=8   |      |
| 1405-120@3  | 8.97  | 0.30 |       |      |
| 1405-120@4  | 8.87  | 0.28 |       |      |
| 1405-120@5  | 9.02  | 0.27 |       |      |
| 1405-120@6  | 8.68  | 0.36 |       |      |
| 1405-120@7  | 8.83  | 0.29 |       |      |



|             |      |      |      |      |
|-------------|------|------|------|------|
| 1405-120@8  | 9.00 | 0.22 |      |      |
| 1605-70@1   | 9.26 | 0.31 | 9.12 | 0.39 |
| 1605-70@2   | 9.28 | 0.25 | n=16 |      |
| 1605-70@3   | 8.97 | 0.24 |      |      |
| 1605-70@4   | 9.50 | 0.30 |      |      |
| 1605-70@5   | 9.01 | 0.26 |      |      |
| 1605-70@6   | 8.75 | 0.30 |      |      |
| 1605-70@7   | 8.90 | 0.33 |      |      |
| 1605-70@8   | 9.21 | 0.34 |      |      |
| 1605-70@9   | 9.16 | 0.40 |      |      |
| 1605-70@10  | 9.05 | 0.38 |      |      |
| 1605-70@11  | 9.18 | 0.34 |      |      |
| 1605-70@12  | 9.18 | 0.38 |      |      |
| 1605-70@13  | 9.17 | 0.24 |      |      |
| 1605-70@16  | 8.78 | 0.24 |      |      |
| 1605-70@17  | 9.17 | 0.40 |      |      |
| 1605-70@18  | 9.30 | 0.39 |      |      |
| 1605-334@1  | 8.76 | 0.34 | 8.83 | 0.36 |
| 1605-334@2  | 9.17 | 0.43 | n=12 |      |
| 1605-334@3  | 8.84 | 0.18 |      |      |
| 1605-334@4  | 8.64 | 0.45 |      |      |
| 1605-334@6  | 9.16 | 0.41 |      |      |
| 1605-334@7  | 8.63 | 0.37 |      |      |
| 1605-334@11 | 8.66 | 0.39 |      |      |
| 1605-334@12 | 8.97 | 0.25 |      |      |
| 1605-334@13 | 8.78 | 0.36 |      |      |
| 1605-334@15 | 8.80 | 0.33 |      |      |
| 1605-334@16 | 8.77 | 0.36 |      |      |
| 1605-334@17 | 8.83 | 0.21 |      |      |
| 1605-268@2  | 9.26 | 0.26 | 9.24 | 0.28 |
| 1605-268@3  | 9.17 | 0.41 | n=9  |      |
| 1605-268@4  | 9.13 | 0.33 |      |      |
| 1605-268@7  | 9.37 | 0.34 |      |      |
| 1605-268@8  | 9.43 | 0.27 |      |      |
| 1605-268@9  | 9.39 | 0.33 |      |      |
| 1605-268@10 | 9.11 | 0.33 |      |      |
| 1605-268@11 | 9.02 | 0.27 |      |      |
| 1605-268@13 | 9.24 | 0.39 |      |      |
| 1605-155@1  | 9.37 | 0.41 | 9.03 | 0.39 |
| 1605-155@2  | 8.91 | 0.33 | n=7  |      |

|            |      |      |      |      |
|------------|------|------|------|------|
| 1605-155@3 | 8.98 | 0.22 |      |      |
| 1605-155@4 | 9.14 | 0.26 |      |      |
| 1605-155@6 | 9.10 | 0.32 |      |      |
| 1605-155@7 | 8.79 | 0.26 |      |      |
| 1605-155@9 | 8.90 | 0.24 |      |      |
| 1605-53@3  | 8.68 | 0.28 | 8.92 | 0.40 |
| 1605-53@4  | 8.92 | 0.34 | n=15 |      |
| 1605-53@5  | 8.82 | 0.23 |      |      |
| 1605-53@6  | 8.92 | 0.37 |      |      |
| 1605-53@7  | 9.23 | 0.35 |      |      |
| 1605-53@8  | 9.05 | 0.28 |      |      |
| 1605-53@9  | 9.30 | 0.39 |      |      |
| 1605-53@10 | 8.70 | 0.25 |      |      |
| 1605-53@12 | 9.11 | 0.33 |      |      |
| 1605-53@13 | 9.03 | 0.39 |      |      |
| 1605-53@14 | 8.80 | 0.32 |      |      |
| 1605-53@15 | 8.75 | 0.33 |      |      |
| 1605-53@16 | 8.65 | 0.36 |      |      |
| 1605-53@17 | 8.85 | 0.33 |      |      |
| 1605-53@19 | 9.00 | 0.30 |      |      |
| 1605-33@1  | 9.15 | 0.37 | 9.46 | 0.44 |
| 1605-33@2  | 9.20 | 0.29 | n=10 |      |
| 1605-33@3  | 9.29 | 0.38 |      |      |
| 1605-33@4  | 9.52 | 0.35 |      |      |
| 1605-33@5  | 9.11 | 0.30 |      |      |
| 1605-33@8  | 9.68 | 0.34 |      |      |
| 1605-33@10 | 9.55 | 0.36 |      |      |
| 1605-33@12 | 9.65 | 0.32 |      |      |
| 1605-33@14 | 9.48 | 0.28 |      |      |
| 1605-33@16 | 9.65 | 0.31 |      |      |

Data do not belong to the main population or show evidence of mineral inclusions, or located at wrong targets after reexamination are rejected (with strikethrough), and thus are not used for mean values calculation.
